# Supplementary material
Source: Springer Nature journal article supplement (https://www.springermedizin.de/resource/supplementary/12885_2008_1192_MOESM5_ESM.pdf/9471368)
Supplement: MOESM5 [file 9471368]

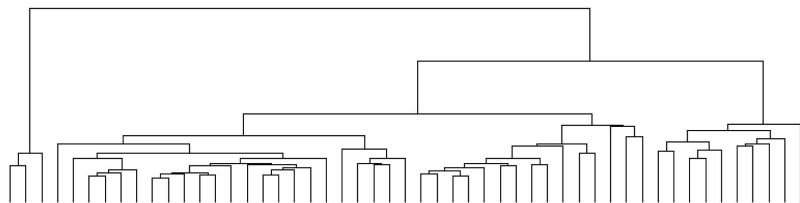

ADA  
 CFS1  
 BCAT1  
 C9orf164  
 ZNF681  
 C1orf43  
 ZNF487  
 C4orf26  
 CUL7  
 PLEKHM2  
 MTERF  
 FLJ3776  
 COMMD9  
 GIT2  
 MGC13057  
 GNG10  
 RPS-1077B9.4  
 TRPV2  
 RAB23  
 RALGAP3  
 PALD3  
 ZNF62  
 TAHER  
 EDEN3  
 PLEKHA6  
 E2F2  
 CCDC99  
 SLC38B4  
 PRPS1L1  
 MRTD4  
 CCNB3IP1  
 SPAT45  
 SERPINE9  
 KRNAB2  
 NPM3  
 TM4SF5  
 SALL4  
 GGH  
 PIR  
 MYO1G  
 TMEM63A  
 FXD3  
 GOL11A  
 ARFIP1  
 CCDC24  
 ARSD  
 FAAH  
 NEIL1  
 OR7E9P  
 RORC

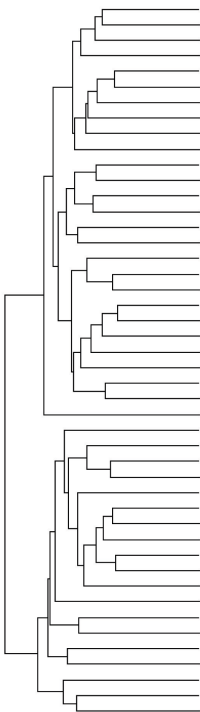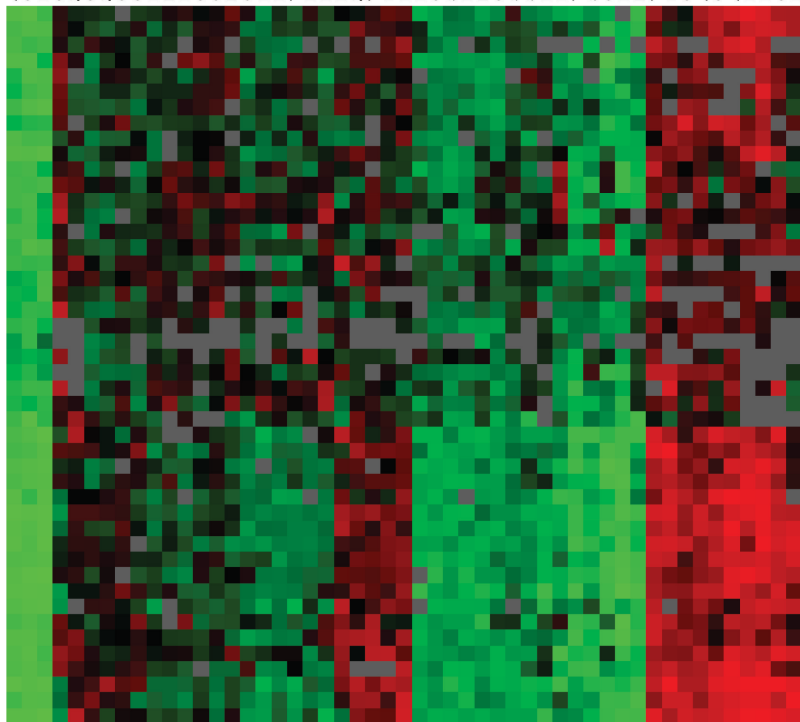

10068  
 9253  
 8640  
 7453  
 5550  
 9138  
 7313  
 6061  
 6195  
 7670  
 11045  
 7960  
 8018  
 8138  
 6039  
 8903  
 4194  
 4296  
 4302  
 6316  
 7807  
 6915  
 8839  
 6381  
 8885  
 9402  
 7680  
 6130  
 8866  
 7547  
 8007  
 7011  
 7198  
 7647  
 7418  
 7641  
 9467  
 7512  
 6880  
 7700  
 9388  
 7613  
 7631  
 7173  
 8009  
 6576
